# Supplementary material for: FTO Common Obesity SNPs Interact with Actionable Environmental Factors: Physical Activity, Sugar-Sweetened Beverages and Wine Consumption
Source: MDPI journal article supplement (doi:10.3390/nu14194202), 2022-10-09
Supplement: s1 [file s1]

**Table S1:** *FTO* SNPs interaction with physical activity

| SNP (n=1735) | Dominant mode    |         | Recessive model |         |
|--------------|------------------|---------|-----------------|---------|
|              | OR $\pm$ 95% CI  | P-value | OR $\pm$ 95% CI | P-value |
| Rs9939609    | 2.52 (2.04-3.12) | <0.001  | 2.94(2.08-4.16) | <0.001  |
| Rs8050136    | 2.53 (2.05-3.13) | <0.001  | 2.9(2.07-4.07)  | <0.001  |
| Rs8051591    | 2.23 (1.78-2.8)  | <0.001  | 2.8(1.9-4)      | <0.001  |
| Rs3751812    | 2.22 (1.76-2.8)  | <0.001  | 2.8(1.9-41)     | <0.001  |
| Rs9935401    | 2.23 (1.78-2.8)  | <0.001  | 2.76(1.9-4)     | <0.001  |
| Rs11075989   | 2.24 (1.78-2.8)  | <0.001  | 2.82(1.9-4.1)   | <0.001  |
| Rs9923233    | 2.23 (1.77-2.8)  | <0.001  | 2.74(1.9-3.97)  | <0.001  |
| Rs9936385    | 2.22 (1.77-2.8)  | <0.001  | 2.82(1.9-4.1)   | <0.001  |
| Rs17817964   | 2.2 (1.75-2.76)  | <0.001  | 2.91(1.9-4.28)  | <0.001  |
| Rs13333228   | 2.3 (1.85-2.85)  | <0.001  | 2.08(1.65-2.63) | <0.001  |
| Rs9302652    | 2.22 (1.79-2.76) | <0.001  | 1.69(1.3-2.2)   | <0.001  |

|            |                  |        |                 |        |
|------------|------------------|--------|-----------------|--------|
| Rs8043757  | 2.23 (1.78-2.8)  | <0.001 | 2.76(1.9-4)     | <0.001 |
| Rs1121980  | 2.32 (1.85-2.9)  | <0.001 | 2.64(1.87-3.73) | <0.001 |
| Rs1558902  | 2.23 (1.77-2.79) | <0.001 | 2.57(1.8-3.66)  | <0.001 |
| Rs17817449 | 2.23 (1.78-2.81) | <0.001 | 2.76(1.9-4)     | <0.001 |
| Rs7202116  | 2.22 (1.77-2.79) | <0.001 | 2.74(1.89-3.97) | <0.001 |
| Rs62033400 | 2.22 (1.77-2.8)  | <0.001 | 2.82(1.93-4.14) | <0.001 |
| Rs7193144  | 2.23 (1.78-2.8)  | <0.001 | 2.76(1.9-4)     | <0.001 |
| Rs11075990 | 2.23 (1.78-2.8)  | <0.001 | 2.82(1.94-4.1)  | <0.001 |
| Rs6499640  | 1.75(1.4-2.18)   | <0.001 | 1.64(1.23-2.18) | <0.001 |
| Rs1421085  | 2.5 (2.03-3.1)   | <0.001 | 2.6 (1.88-3.6)  | <0.001 |

---

OR: Odds ratio

CI: confidence interval

Adjusted to age and gender
